# Supplementary material for: Hierarchical Layer Engineering Using Supramolecular Double‐Comb Diblock Copolymers
Source: PubMed Central journal article supplement — Angew Chem Int Ed Engl. 2016 Oct 6;55(42):13081–5. doi: 10.1002/anie.201606890 (PMC5113798; doi:10.1002/anie.201606890), 2016-10-06
Supplement: ANIE-55-13081-s001.pdf [file ANIE-55-13081-s001.pdf]

Supporting Information

**Hierarchical Layer Engineering Using Supramolecular Double-Comb  
Diblock Copolymers**

*Anton H. Hofman, Mehedi Reza, Janne Ruokolainen, Gerrit ten Brinke,\* and Katja Loos\**

anie\_201606890\_sm\_miscellaneous\_information.pdf

# Experimental

## Materials

Five symmetric (i.e.  $f_{\text{P4VP}} \approx f_{\text{PAPI}} \approx 0.5$ ) P4VP-*b*-PAPI diblock copolymers with molecular weights ranging from 31 up to 272 kg·mol<sup>-1</sup> were prepared by RAFT polymerization.<sup>1</sup> Exact reaction conditions are provided in Tables S1 and S2, for the preparation of P4VP macro-CTAs and P4VP-*b*-PAPI diblock copolymers, respectively. 3-NDP amphiphiles were synthesized according to the route described in ref. 2. All solvents were of analytical grade.

## Sample Preparation

Neat block copolymer (BCP) bulk films were obtained by slow evaporation of chloroform (room temperature, P4PA272k-51) or *N,N*-dimethylformamide (45 °C, other four BCPs) based solutions (150 mg, 2 wt%) in a saturated solvent atmosphere. Complete evaporation was achieved in 4 days up to one week. Equilibrium structures of the films were checked by thermal annealing at 200 °C in vacuum for at least 5 days.

P4PA(3-NDP)<sub>0.5</sub> complexes were prepared by dissolving the parent BCP together with the calculated amount of 3-NDP (150 mg material) in analytical grade DMF, and casting these solutions into 4 cm diameter Petri dishes. Similar to the diblock copolymers, full evaporation of the solvent was achieved in roughly 5 days. Complexes were subsequently annealed at 130 °C for 1 h.

Ultrathin sections (80 nm) for transmission electron microscopy (TEM) were acquired by microtoming in epoxy (EpoFix, Electron Microscopy Sciences) embedded pieces of the bulk films using a Leica Ultracut UCT ultramicrotome equipped with a 35° DiATOME diamond knife. Enhanced contrast was realized by staining the sections with iodine for 1 to 3 h (BCPs) or 10 min up to 1 h (complexes).

## Characterization

Molecular weights of the P4VP homopolymers and molecular weight distributions (BCPs) were determined by gel permeation chromatography (GPC). It was performed in DMF (containing 0.01 M LiBr) on a Viscotek GPCmax equipped with model 302 TDA detectors, using a guard column (PSS-GRAM, 10 μm 5 cm) and two analytical columns (PSS-GRAM-1000/30 Å, 10 μm 30 cm) at a flow rate of 1.0 ml·min<sup>-1</sup>. Both the columns and detectors were held at 50 °C. Narrow PMMA standards were used for calibration of the system and samples were filtered over a 0.45 μm PTFE filter prior to injection. Molecular weights were calculated by applying a triple detection method (refractive index, viscosity and light scattering) using Viscotec OmniseC software. A predetermined refractive index

increment ( $dn/dc$ ) of  $0.153 \text{ ml}\cdot\text{g}^{-1}$  was used for P4VP homopolymers.<sup>3</sup> Molecular weights of the P4PA diblock copolymers were determined by using their composition ( $^1\text{H-NMR}$ ) and the molecular weight of the applied P4VP macro-CTA.

Differential scanning calorimetry (DSC) was performed on a TA Instruments DSC Q1000 by heating the samples to  $150^\circ\text{C}$  and cooling to  $-20^\circ\text{C}$  at a rate of  $10^\circ\text{C}\cdot\text{min}^{-1}$ . The second heating cycle was used for analysis.

Small-angle X-ray scattering (SAXS) measurements were carried out at the Dutch-Belgian Beamline (DUBBLE) station BM26B of the European Synchrotron Radiation Facility (ESRF) in Grenoble, France.<sup>4,5</sup> The sample-to-detector distance (Dectris Pilatus 1M) of the setup was ca. 5.0 m. The scattering vector  $q$  is defined as  $q = 4\pi/\lambda \sin \theta$  with  $2\theta$  being the scattering angle and  $\lambda$  the wavelength of the X-rays ( $1.03 \text{ \AA}$ ). The acquisition time was 3 to 5 min per sample (room temperature) or 30 s per frame (temperature-resolved measurements).

Sections of both iodine stained diblock copolymers and complexes were analyzed on a Philips CM12 electron microscope operating at an accelerating voltage of 120 kV. Images were recorded on a Gatan slow-scan CCD camera. Unstained complexes were measured at the Nanomicroscopy Center (Aalto University, Espoo, Finland) using a 300 kV JEOL JEM-3200FSC cryo-TEM. Micrographs collected on this instrument were taken in bright field mode using a zero-loss energy filter (omega type) with a slit width of 20 eV and were recorded on a Gatan Ultrascan 4000 CCD camera. The samples were kept at liquid helium temperature for enhanced stability.

## Polymer synthesis

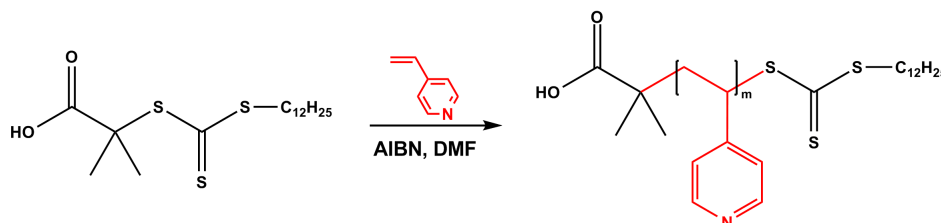

| Macro-CTA | [DIBTTC] | [AIBN] | [AIBN]/[DIBTTC] | [4VP] (M) | $T$ | $t_R$ | Conv. | $M_{n,\text{theory}}$ | $M_{n,\text{GPC}}$ | $M_w/M_n$ |
|-----------|----------|--------|-----------------|-----------|-----|-------|-------|-----------------------|--------------------|-----------|
| P4VP-14k  | 19       | 1.0    | 1/18            | 3.8       | 70  | 21    | 57    | 12.8                  | 14.2               | 1.13      |
| P4VP-29k  | 9.8      | 1.0    | 1/10            | 3.7       | 70  | 20    | 66    | 26.5                  | 28.8               | 1.05      |
| P4VP-52k  | 6.5      | 0.63   | 1/10            | 6.1       | 70  | 18    | 50    | 49.3                  | 52.0               | 1.11      |
| P4VP-93k  | 4.6      | 0.55   | 1/8.4           | 7.6       | 70  | 21    | 48    | 83.9                  | 93.4               | 1.09      |
| P4VP-137k | 4.3      | 0.51   | 1/8.4           | 8.0       | 80  | 22    | 64    | 125                   | 137                | 1.09      |

**Table S1:** Reaction conditions and analysis of RAFT-synthesized P4VP macro-CTAs. Concentrations [DIBTTC] and [AIBN] are in mM, temperatures  $T$  in °C, reaction times  $t_R$  in h, conversions (Conv.) in % and molecular weights in  $\text{kg}\cdot\text{mol}^{-1}$ .

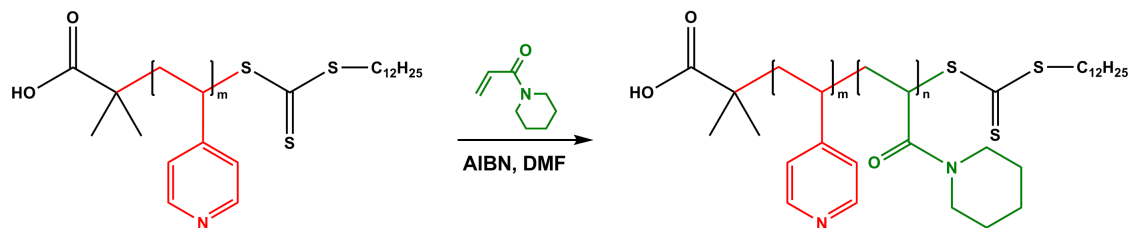

| BCP         | [P4VP] | [AIBN] | [AIBN]/[P4VP] | [API] (M) | $t_R$ | Conv. |
|-------------|--------|--------|---------------|-----------|-------|-------|
| P4PA31k-47  | 14     | 1.2    | 1/12          | 1.7       | 19    | 90    |
| P4PA57k-47  | 7.1    | 0.76   | 1/9.4         | 1.8       | 17    | 83    |
| P4PA109k-48 | 4.2    | 0.42   | 1/10          | 2.2       | 19    | 76    |
| P4PA189k-50 | 2.1    | 0.24   | 1/8.4         | 1.9       | 22    | 68    |
| P4PA272k-51 | 1.1    | 0.12   | 1/8.7         | 1.9       | 18    | 56    |

**Table S2:** Reaction conditions for the preparation of P4VP-*b*-PAPI diblock copolymers by RAFT. Concentrations [P4VP] and [AIBN] are in mM, reaction times  $t_R$  in h and conversions (Conv.) in %.

## P4VP-*b*-PAPI self-assembly

| BCP         | $M_n$ (kg·mol <sup>-1</sup> ) | $M_w/M_n$ | $f_{P4VP}$ | $d_{SAXS}$ | $\chi N$ |
|-------------|-------------------------------|-----------|------------|------------|----------|
| P4PA31k-47  | 30.5                          | 1.12      | 0.47       | 22.6       | 9        |
| P4PA57k-47  | 56.5                          | 1.06      | 0.47       | 37.2       | 17       |
| P4PA109k-48 | 109                           | 1.19      | 0.48       | 60.2       | 33       |
| P4PA189k-50 | 189                           | 1.29      | 0.50       | 93.4       | 57       |
| P4PA272k-51 | 272                           | 1.29      | 0.51       | 146        | 82       |

**Table S3:** Overview of the RAFT-synthesized symmetric P4PA diblock copolymers. Fractions represent weight fractions,  $d_{SAXS}$  is in nm,  $\chi = 0.03$  and  $N = M_n/100$  g·mol<sup>-1</sup>.<sup>1</sup>

## P4PA(3-NDP)<sub>0.5</sub> self-assembly

| BCP         | $d_{L, \text{TEM}}$ (nm) | $d_L$ (nm) | $d_S$ (nm) | $n_{\text{SAXS}}$ | $n_{\text{TEM}}$ | $n_{\text{TEM, P4VP}}$ | $n_{\text{TEM, PAPI}}$ |
|-------------|--------------------------|------------|------------|-------------------|------------------|------------------------|------------------------|
| P4PA31k-47  | 17                       | 17.5       | 4.4        | 4                 | 4                | 2                      | 2                      |
| P4PA57k-47  | 28                       | 26.9       | 4.5        | 6                 | 6                | 3                      | 3                      |
| P4PA109k-48 | 36                       | 36.8       | 4.4        | 8                 | 8                | 4                      | 4                      |
| P4PA189k-50 | 54                       | 49.2       | 4.4        | 11                | ~ 11             | 5 to 6                 | 5 to 6                 |
| P4PA272k-51 | 76                       | 77.0       | 4.5        | 17                | ~ 17             | 8                      | 9 to 10                |

**Table S4:** Overview of the characteristics of each P4PA(3-NDP)<sub>0.5</sub> double parallel lamellar-*in*-lamellar structure.  $n_i$  is the number of internal structures ( $d_S$ ) and domain spacings  $d_i$  were obtained from SAXS.  $d_{L, \text{TEM}}$  was determined using the Fourier transformations illustrated in Figure S3.

| BCP         | $T$ (°C) | $d_L$ (nm) | $\Delta q$ (nm <sup>-1</sup> ) | $L$ (nm) | $\bar{N}$ |
|-------------|----------|------------|--------------------------------|----------|-----------|
| P4PA31k-47  | 57.5     | 18.9       | 0.023                          | 257      | 14        |
| P4PA57k-47  | 65.0     | 28.6       | 0.028                          | 211      | 7.4       |
| P4PA109k-48 | 57.5     | 42.5       | 0.018                          | 328      | 7.7       |
| P4PA189k-50 | 57.5     | 53.8       | 0.011                          | 537      | 10        |
| P4PA272k-51 | 57.5     | 90.6       | 0.0095                         | 621      | 6.9       |

**Table S5:** Scherrer correlation length ( $L$ ) analysis of P4PA(3-NDP)<sub>0.5</sub> supramolecular complexes, with  $\Delta q$  being the full width at half-maximum of the primary scattering peak.  $L = 2\pi K/\Delta q$ , with  $K = 2\sqrt{\ln(2)}/\pi \approx 0.9394$ .  $\bar{N}$  is the average number of Bragg planes (i.e.  $\bar{N} = L/d_L$ ).<sup>6</sup> Analysis was performed in the melt state (Figure S2), due to its stronger scattering compared to the crystalline state.

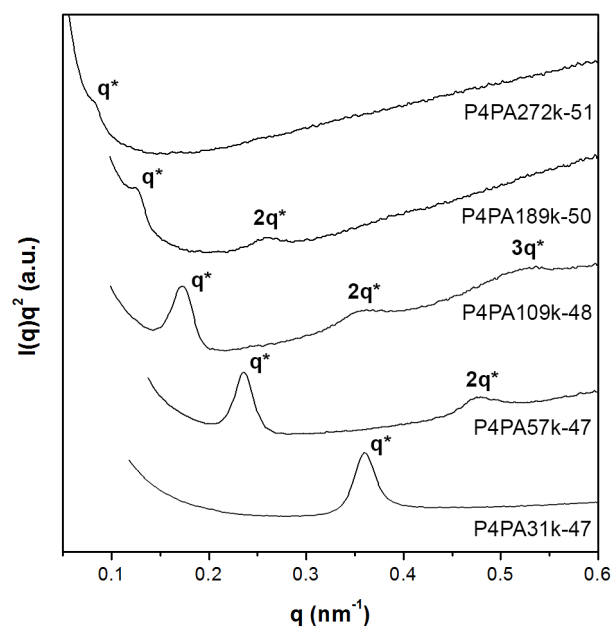

**Figure S1:** Room temperature Lorentz-corrected SAXS profiles of P4PA(3-NDP)<sub>0.5</sub>. First order scattering maxima ( $q^*$ ) are clearly visible.

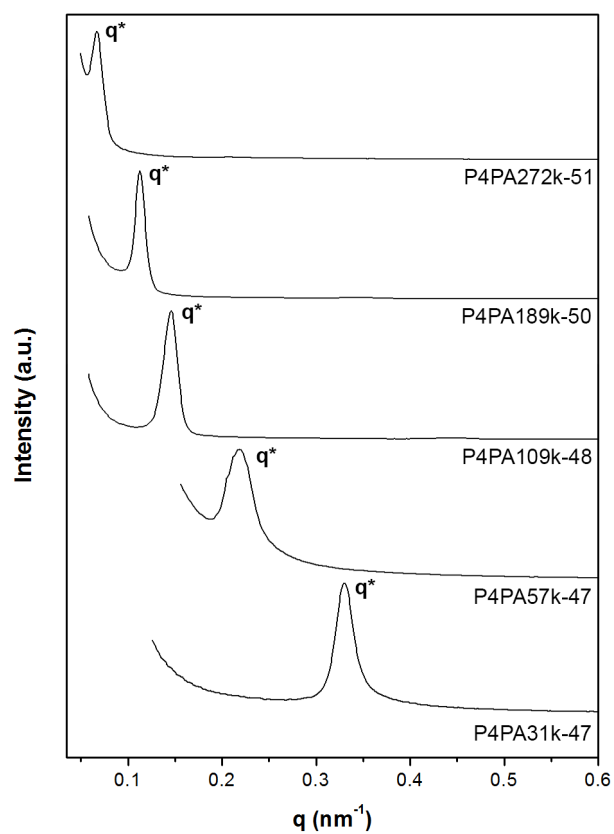

**Figure S2:** SAXS profiles of P4PA(3-NDP)<sub>0.5</sub> recorded at  $T > T_m$  ( $T = 55 - 65^\circ\text{C}$ ) used for the Scherrer grain size analysis (Table S5).



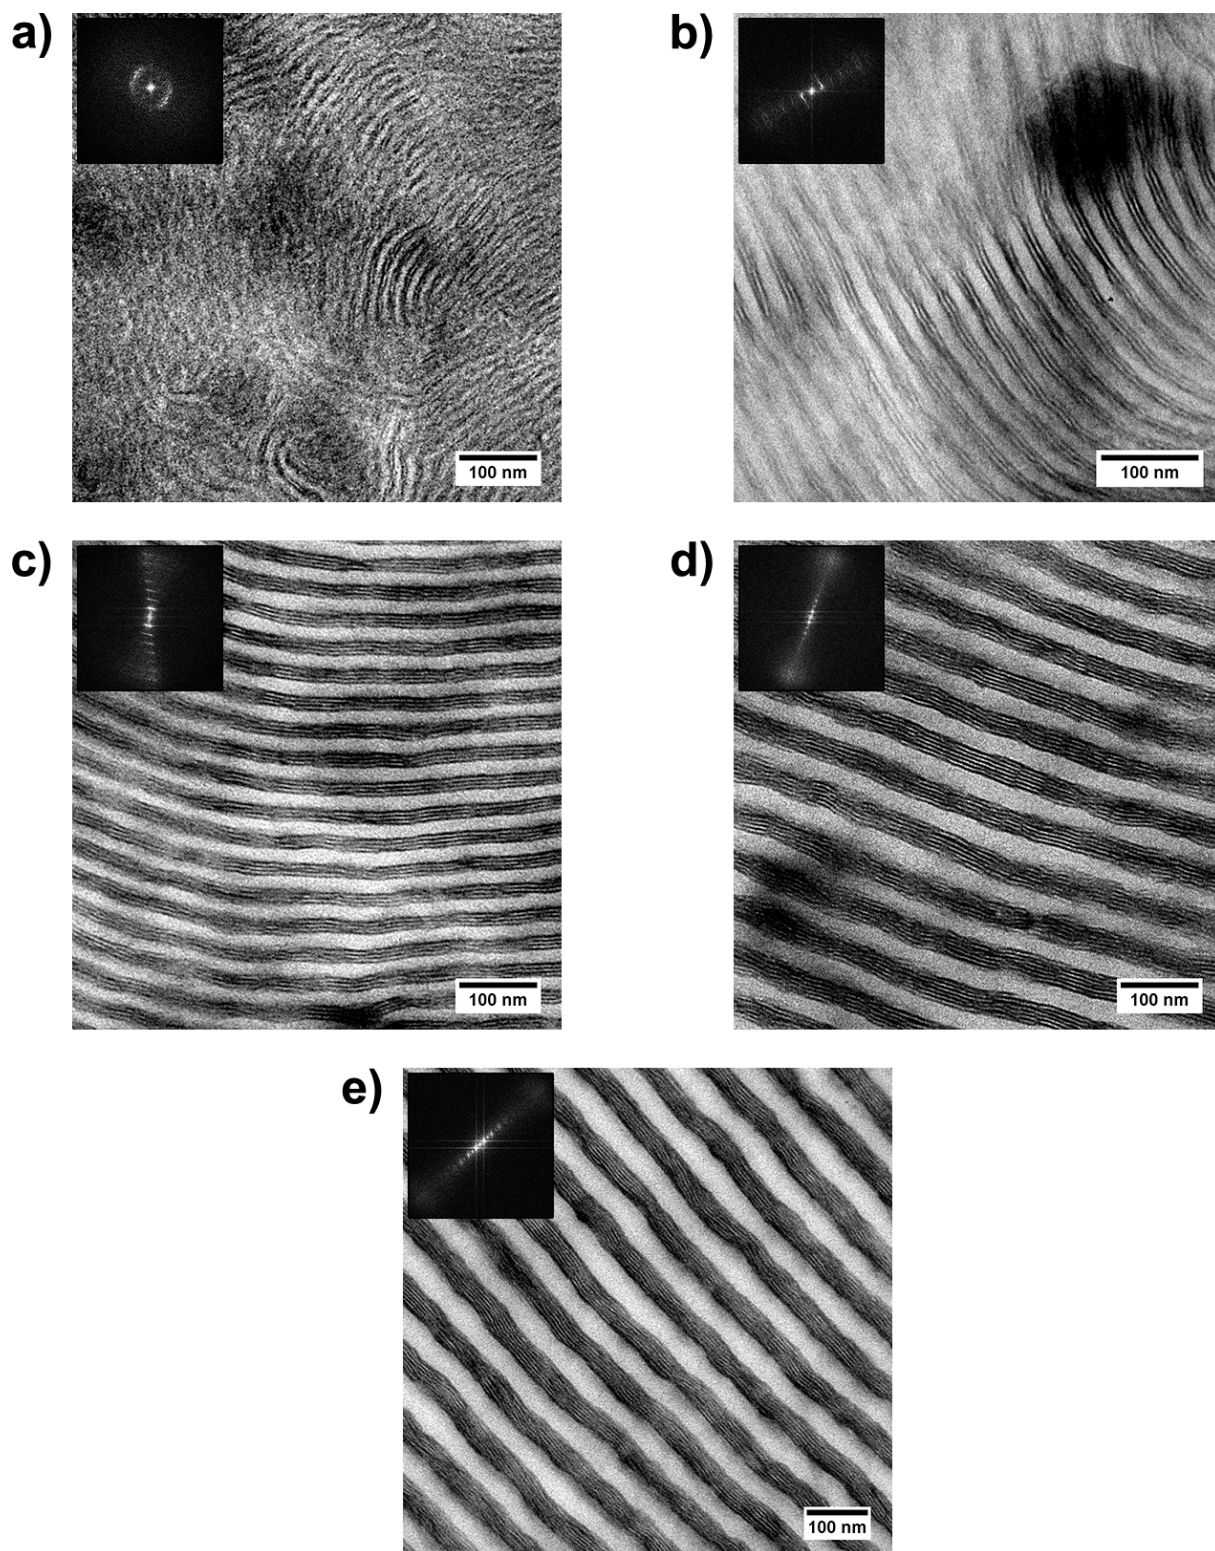

**Figure S3:** Electron micrographs of iodine stained P4PA(3-NDP)<sub>0.5</sub> supramolecular complexes recorded at a lower magnification. Insets show their corresponding Fourier transformation. P4PA31k-47 (a), P4PA57k-47 (b), P4PA109k-48 (c), P4PA189k-50 (d) and P4PA272k-51 (e).

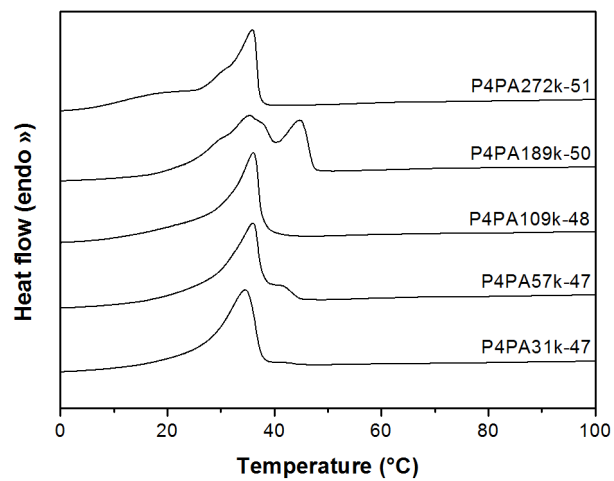

**Figure S4:** DSC thermograms of P4PA(3-NDP)<sub>0.5</sub> supramolecular double-comb diblock copolymers.

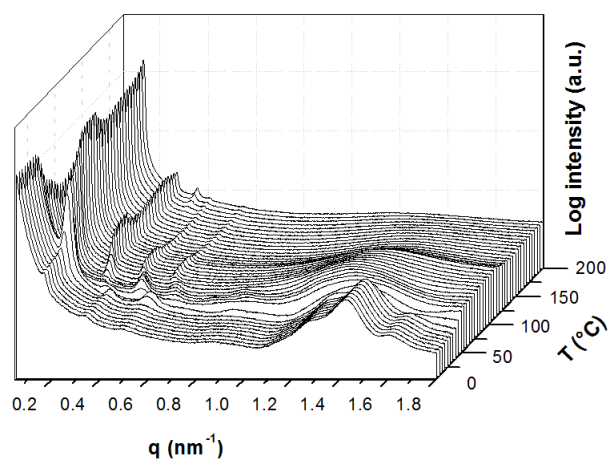

**Figure S5:** Temperature-resolved SAXS intensity profiles of P4PA109k-48(3-NDP)<sub>0.5</sub> (heating scan, 10 °C·min<sup>-1</sup>).

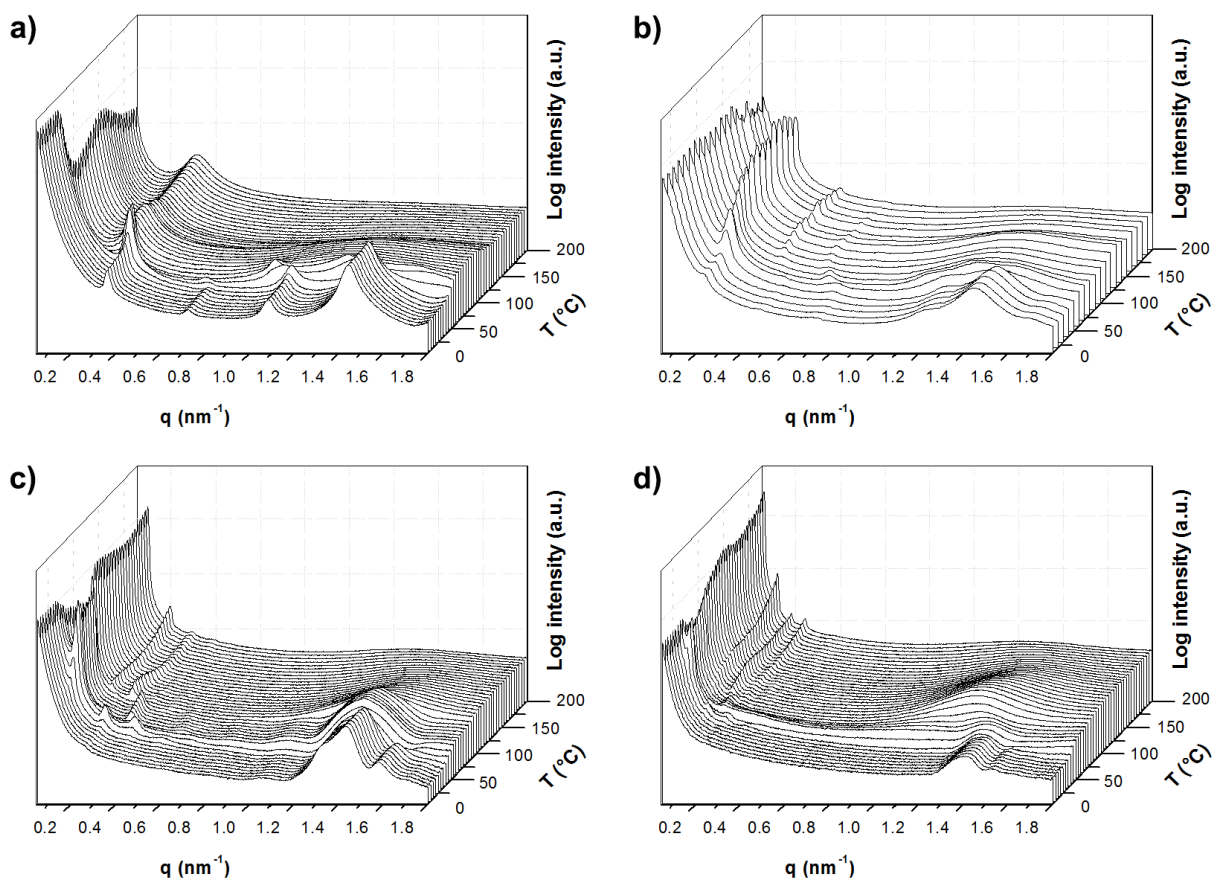

**Figure S6:** Temperature-resolved SAXS intensity profiles of P4PA(3-NDP)<sub>0.5</sub>: P4PA31k-47 (a), P4PA57k-47 (b), P4PA189k-50 (c) and P4PA272k-51 (d). Heating scans were performed at 10 °C·min<sup>-1</sup> (P4PA31k-47, P4PA189k-50 and P4PA272k-51) or 20 °C·min<sup>-1</sup> (P4PA57k-47).

## References

1. Hofman, A. H.; Alberda van Ekenstein, G. O. R.; Woortman, A. J. J.; ten Brinke, G.; Loos, K. *Polym. Chem.* **2015**, *6*, 7015–7026.
2. Hofman, A. H.; Chen, Y.; ten Brinke, G.; Loos, K. *Macromolecules* **2015**, *48*, 1554–1562.
3. Brandrup, J.; Immergut, E. H.; Grulke, E. A.; Abe, A.; Bloch, D. R. *Polymer Handbook*, 4th ed.; John Wiley & Sons, Inc., 1999.
4. Borsboom, M.; Bras, W.; Cerjak, I.; Detollenaere, D.; Glastra van Loon, D.; Goedtkindt, P.; Konijnenburg, M.; Lassing, P.; Levine, Y. K.; Munneke, B.; Over-sluisen, M.; van Tol, R.; Vlieg, E. *J. Synchrotron Radiat.* **1998**, *5*, 518–520.
5. Bras, W.; Dolbnya, I. P.; Detollenaere, D.; van Tol, R.; Malfois, M.; Greaves, G. N.; Ryan, A. J.; Heeley, E. *J. Appl. Crystallogr.* **2003**, *36*, 791–794.
6. Smilgies, D. M. *J. Appl. Crystallogr.* **2009**, *42*, 1030–1034.
